# Supplementary material for: A novel luminescent monolayer thin film based on postsynthetic method and functional linker
Source: Royal Society of Chemistry journal article supplement (doi:10.1039/c4tc00578c), 2014-01-01
Supplement: c4tc00578c1.pdf [file c4tc00578c1.pdf]

## SUPPLEMENTARY INFORMATION

### A Novel Visible and Near-infrared Luminescent Monolayer Thin Film based on Postsynthetic Method and Functional Linker

Ye Lu and Bing Yan\*

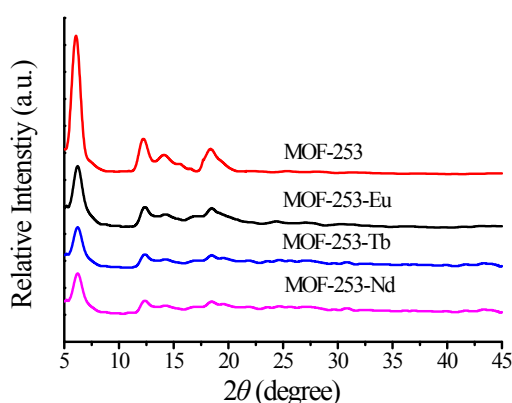

**Figure S1** Powder x-ray diffraction patterns for MOF-253, MOF-253-Eu, MOF-253-Tb and MOF-253-Yb, the PXRD of MOF-253 is consistent with reported literature.<sup>S2</sup>

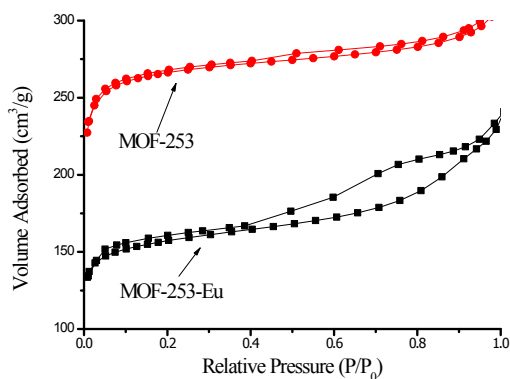

**Figure S2** N<sub>2</sub> adsorption-desorption isotherms of MOF-253 and MOF-253-Eu, the Langmuir surface areas of MOF-253 and MOF-253-Eu were calculated to be 1156, and 341 m<sup>2</sup>/g, the Langmuir surface of MOF-253 is consistent with reported literature.<sup>S3</sup>

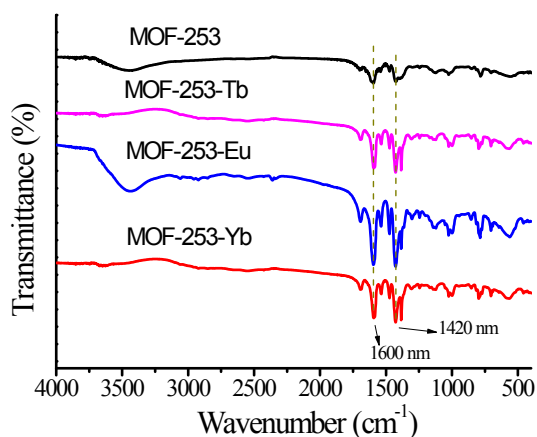

**Figure S3** FT-IR spectra of MOF-253, MOF-253-Tb, MOF-253-Eu and MOF-253-Yb.

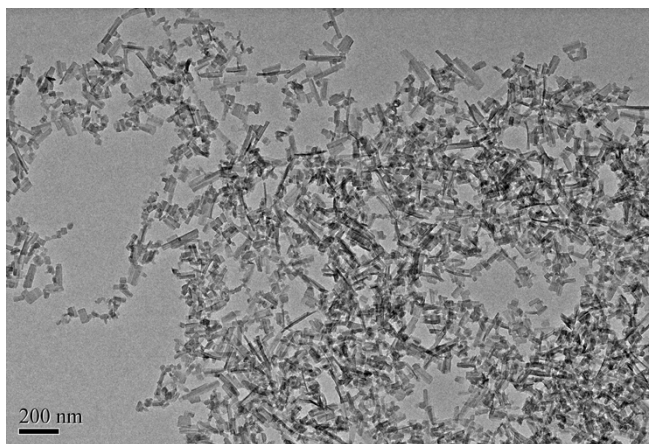

**Figure S4** TEM image of MOF-253.

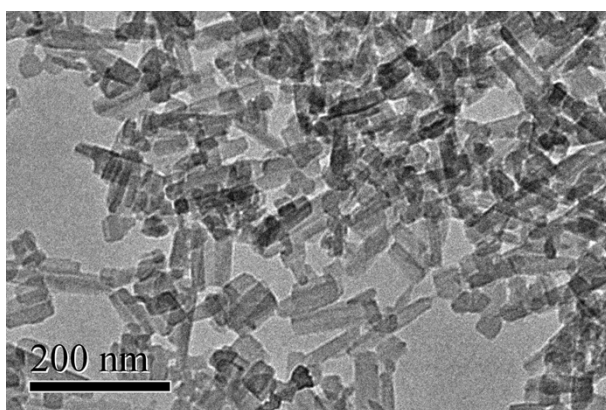

**Figure S5** TEM image of MOF-253-Eu.

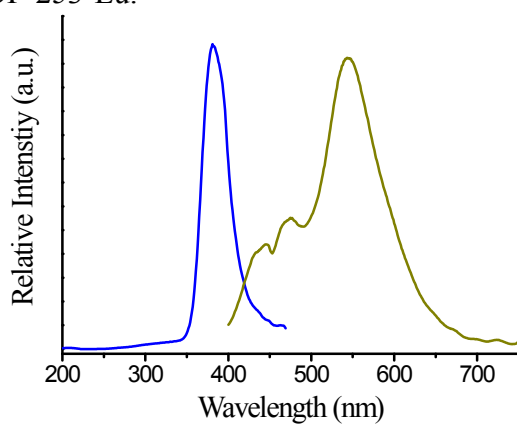

**Figure S6** The excitation (blue) and PL spectra (yellow) of MOF-253 ( $\lambda_{em} = 550$  nm and  $\lambda_{ex} = 380$  nm).

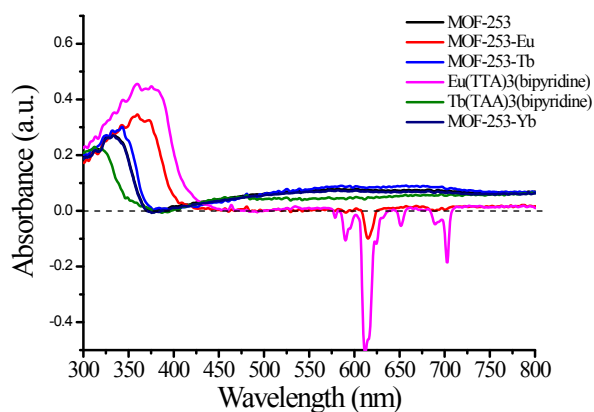

**Figure S7** UV-visible diffuse reflectance spectra (DRS) of MOF-253-based luminescent material and lanthanide complex.

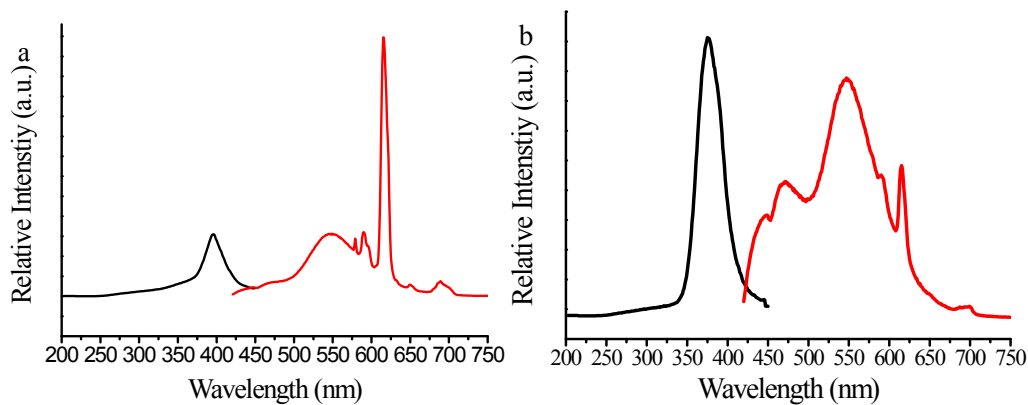

**Figure S8** The luminescent spectra of MOF-253-Eu (a) and MOF-253 with Eu<sup>3+</sup> ion (b) ( $\lambda_{em} = 550$  nm and  $\lambda_{ex} = 380$  nm).

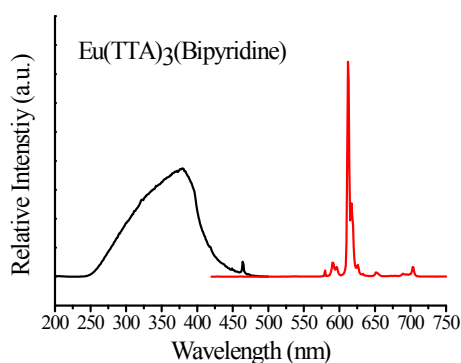

**Figure S9** The luminescent spectra of Eu(TTA)<sub>3</sub>(bipyridine) ( $\lambda_{em} = 614$  nm and  $\lambda_{ex} = 380$  nm).

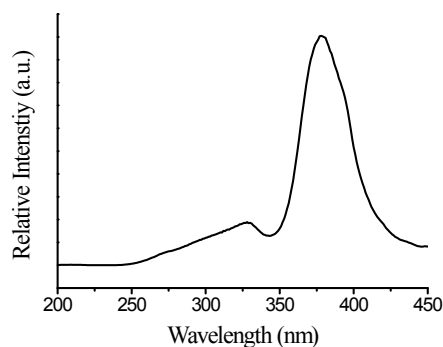

**Figure S10** The excitation spectrum of MOF-253-Tb ( $\lambda_{em} = 545$  nm).

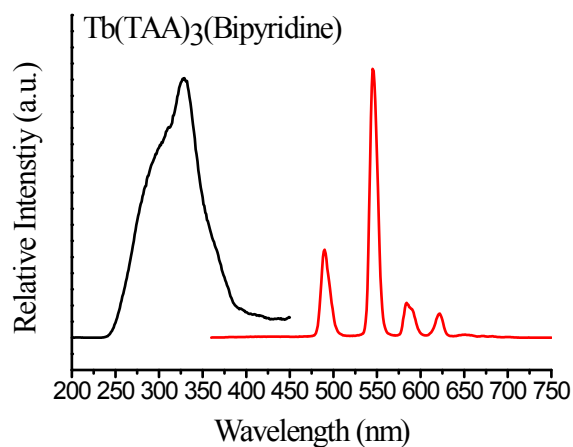

**Figure S11** The luminescent spectra of Tb(TAA)<sub>3</sub>(bipyridine) ( $\lambda_{em} = 545$  nm and  $\lambda_{ex} = 330$  nm).

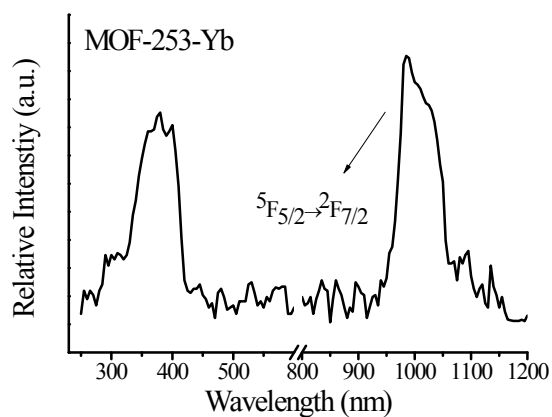

**Figure S12** The luminescent spectra of MOF-253-Yb ( $\lambda_{\text{em}} = 980$  nm and  $\lambda_{\text{ex}} = 378$  nm).

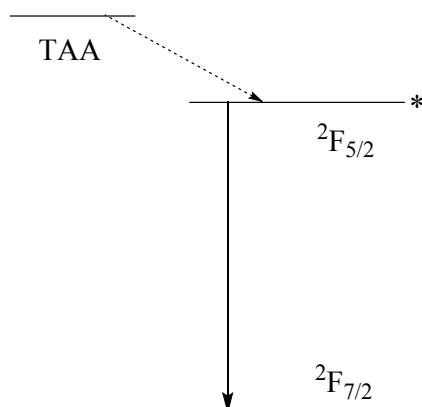

**Figure S13** Schematic energy level diagrams of the sensitization of TAA to  $\text{Yb}^{3+}$  ion.

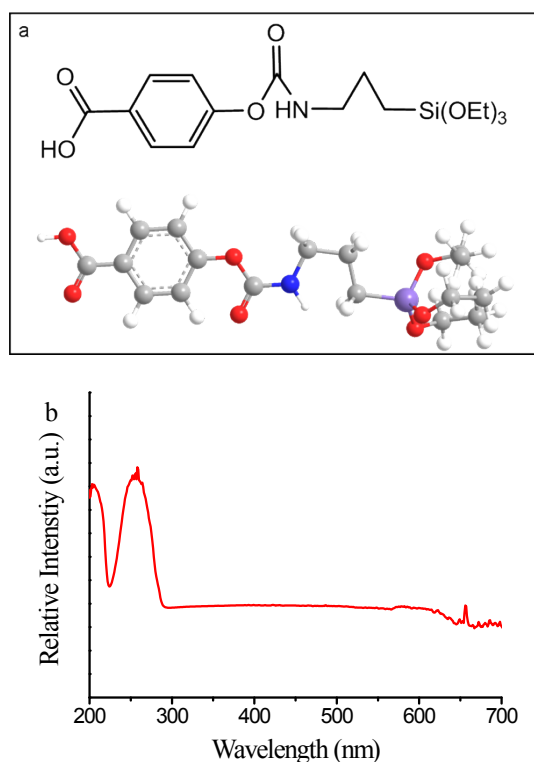

**Figure S14** (a) Molecule structure of linker 1 HBA-TEPIC (HBA = 1,4-hydroxybenzoic acid, TEPIC= 3- (triethoxysilyl)-propyl-isocyanate); (b) the UV-visible absorbance spectrum of HBA-TEPIC, recorded in ethanol solution.

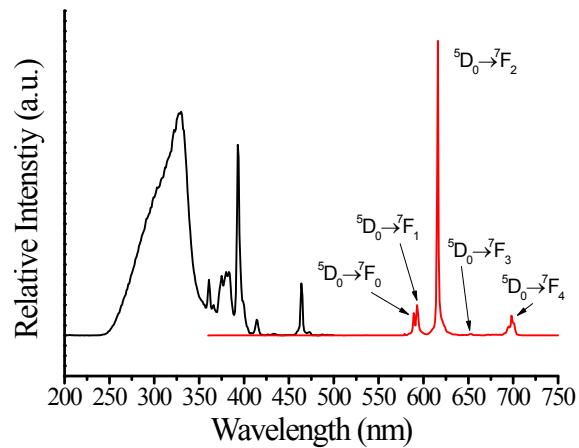

**Figure S15** The luminescent spectra of 1-(Eu<sup>3+</sup>)quartz ( $\lambda_{em} = 616$  nm and  $\lambda_{ex} = 330$  nm).

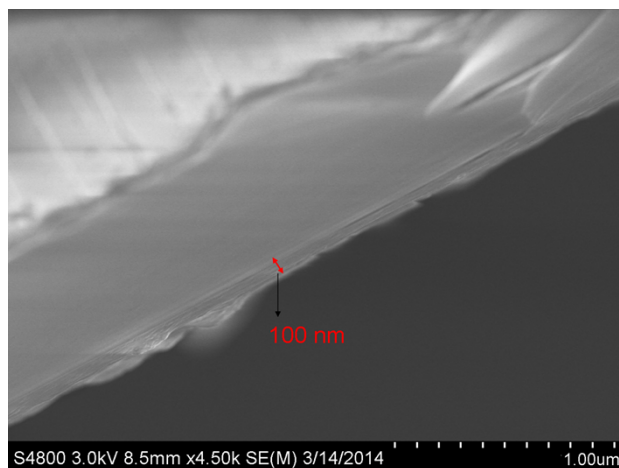

**Figure S16** SEM images of MOF-1(Eu<sup>3+</sup>)quartz thin film viewed from cross-section.

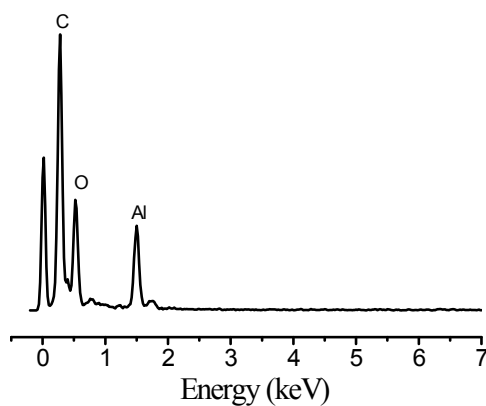

**Figure S17** EDS of MOF-1(Eu<sup>3+</sup>)quartz thin film from cross-section.

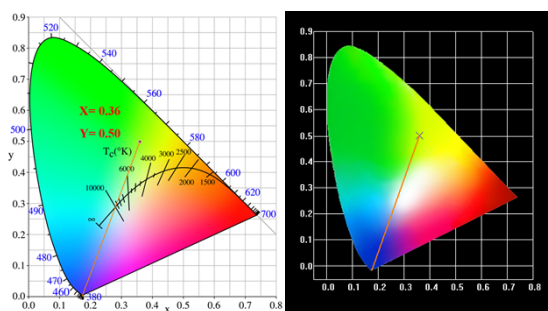

**Figure S18** The CIE plot of MOF-253

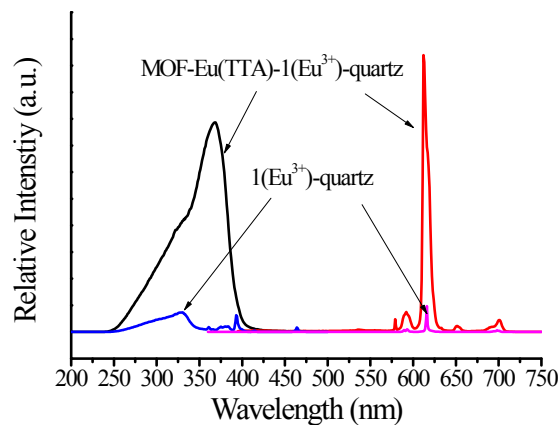

**Figure S19** The excitation (blue) and emission spectra (pink) of 1-(Eu<sup>3+</sup>)quartz (excited and monitored at 328 nm and 616 nm, respectively); the excitation (black) and emission spectra (red) of MOF-Eu(TTA)-1-(Eu<sup>3+</sup>)quartz (excited and monitored at 368 nm and 612 nm, respectively)

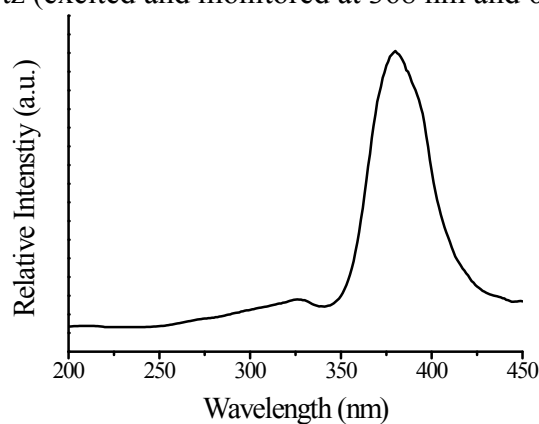

**Figure S20** The excitation spectrum of MOF-Tb(TAA)-1-(Tb<sup>3+</sup>)quartz ( $\lambda_{em} = 545$  nm).

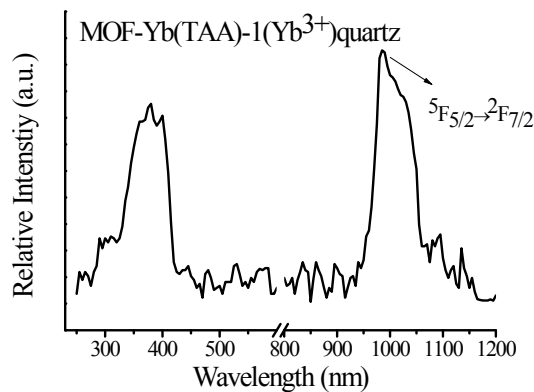

**Figure S21** The luminescent spectra of MOF-Yb(TAA)-1-(Yb<sup>3+</sup>)quartz, excited and monitored at 380 and 984 nm, respectively

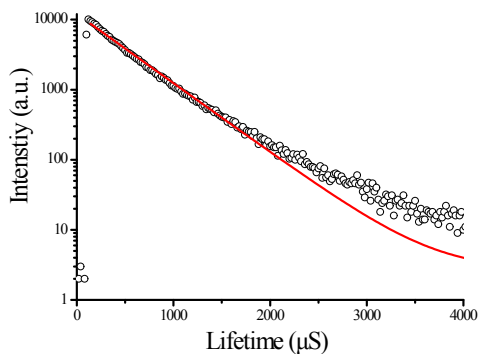

**Figure S22** Decay curve of MOF-Eu(TTA)-1(Eu<sup>3+</sup>)-quartz.

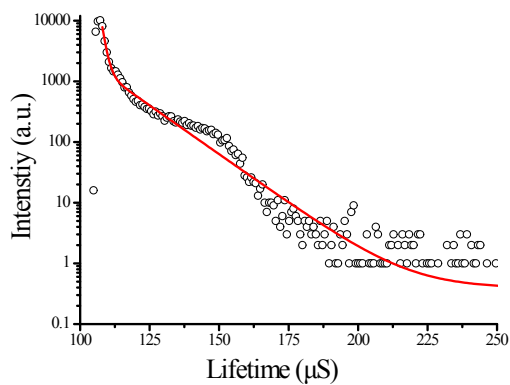

**Figure S23** Decay curve of MOF-Tb(TAA)-1(Tb<sup>3+</sup>)-quartz.

### References:

S1 X. F. Qiao, B. Yan, *Dalton Trans.*, 2009, 8509.

S2 E. D. Bloch, D. Britt, C. Lee, C. J. Doonan, F. J. Uribe-Romo, H. Furukawa, J. R. Long, O. M. Yaghi, *J. Am. Chem. Soc.*, 2010, **132**, 14382.

S3 F. Carson, S. Agrawal, M. Gustafsson, A. Bartoszewicz, F. Moraga, X. D. Zou, B. Martin-Matute, *Chem-Eur. J.*, 2012, **18**, 15337.
